# Supplementary material for: Comparative Co-Evolution Analysis Between the HA and NA Genes of Influenza A Virus
Source: PubMed Central journal article supplement — Virology (Auckl). 2018 Jul 19;9:1178122X18788328. doi: 10.1177/1178122X18788328 (PMC6053862; doi:10.1177/1178122x18788328), 2018-07-19
Supplement: Supplementary_Tables.pdf [file Supplementary_Tables.pdf]

## Supplementary Tables

### Supplementary data

**Supplementary table 1.** H1N1 Influenza A virus sequence data (accession number\_year)

| Avian         |               | Human         |               | Swine         |               |
|---------------|---------------|---------------|---------------|---------------|---------------|
| HA            | NA            | HA            | NA            | HA            | NA            |
| D10477_1976   | AF250362_1976 | AF117241_1918 | AF250356_1918 | X57492_1930   | AF250364_1930 |
| AF091313_1977 | AY207534_1977 | CY009604_1933 | L25815_1933   | CY045740_1931 | CY045742_1931 |
| CY179395_1979 | CY179397_1979 | CY019955_1935 | CY019957_1935 | CY027291_1935 | CY027293_1935 |
| L25071_1980   | EU742638_1980 | CY020445_1936 | CY020447_1936 | CY026427_1942 | CY026429_1942 |
| AF091310_1981 | CY005868_1981 | CY013271_1940 | CY013273_1940 | CY026283_1957 | CY026285_1957 |
| GU066779_1983 | GU066780_1983 | CY009276_1942 | CY009278_1942 | AF091307_1961 | CY032215_1961 |
| CY179203_1984 | CY179205_1984 | CY009452_1943 | AF250365_1943 | CY026299_1966 | CY026301_1966 |
| AF091311_1985 | KF424148_1985 | CY021709_1945 | CY021711_1945 | CY026291_1967 | CY026293_1967 |
| EU743306_1986 | AF250358_1986 | U02085_1947   | AF250357_1947 | EU139825_1968 | EU139835_1968 |
| GU050711_1987 | AJ416626_1987 | CY019947_1948 | CY019949_1948 | CY022437_1970 | CY022439_1970 |
| EU735786_1988 | EU735788_1988 | CY019971_1949 | CY019973_1949 | CY022413_1971 | CY022415_1971 |
| CY136745_1990 | EU743153_1990 | CY077719_1950 | CY009334_1950 | EU139826_1973 | EU139836_1973 |
| EU735794_1991 | AY207541_1991 | CY077768_1951 | CY021823_1951 | CY022341_1975 | CY022343_1975 |
| EU743159_1992 | EU743161_1992 | CY077748_1953 | AB745480_1953 | K00992_1976   | AF250363_1976 |
| EU735802_1993 | AF250361_1993 | M38312_1954   | M38309_1954   | CY009916_1977 | CY022271_1977 |
| EU026102_1994 | EF607903_1994 | CY008988_1957 | CY008990_1957 | CY022405_1978 | CY022407_1978 |
| EU026110_1995 | EF607902_1995 | CY178719_1976 | M27970_1976   | CY022365_1979 | CY022367_1979 |
| AB271115_1996 | EF607904_1996 | CY010372_1977 | K02018_1977   | CY022421_1980 | CY022423_1980 |
| AY633212_1998 | EU743177_1998 | CY010868_1978 | CY010870_1978 | CY022381_1981 | U86144_1981   |
| HE802061_1999 | CY091594_1999 | M38353_1979   | M38335_1979   | CY116348_1982 | AJ412692_1982 |
| AY180460_2000 | AY180836_2000 | CY010908_1980 | CY010910_1980 | AF091316_1983 | GU236519_1983 |
| CY139649_2001 | AJ697876_2001 | CY021029_1981 | CY021031_1981 | AF091317_1985 | CY022319_1985 |
| EU182325_2002 | EF607906_2002 | CY009620_1982 | CY010366_1982 | U72666_1986   | CY028790_1986 |
| GQ257448_2003 | EU980510_2003 | CY010916_1983 | CY010918_1983 | AF091315_1987 | CY022471_1987 |
| CY137602_2004 | CY137604_2004 | CY021725_1984 | CY021727_1984 | M81707_1988   | GU052269_1988 |
| AB670330_2005 | CY029843_2005 | CY019101_1986 | D31948_1986   | CY035070_1990 | CY035072_1990 |
| FJ432770_2006 | CY043906_2006 | CY019771_1987 | CY019773_1987 | CY022477_1991 | CY022479_1991 |
| FN386463_2007 | KF424124_2007 | Z54287_1988   | D31944_1988   | L09063_1992   | KP788774_1992 |
| AB546153_2008 | CY140047_2008 | D13573_1989   | D31950_1989   | U72668_1993   | KR701559_1993 |
| CY190971_2009 | CY190973_2009 | L24362_1991   | CY009318_1991 | CY098500_1994 | KR700455_1994 |
| KJ764764_2010 | CY097764_2010 | JX477159_1993 | CY125046_1993 | AM920728_1995 | AM920729_1995 |
| CY133685_2011 | CY132836_2011 | U53162_1994   | U53166_1994   | CY116252_1996 | CY115890_1996 |
| CY134343_2012 | CY134353_2012 | AF386773_1995 | AJ518097_1995 | AF222026_1997 | DQ280259_1997 |
| KP658026_2014 | CY191301_2014 | AY282756_1996 | AY904335_1996 | AF222034_1998 | FJ805963_1998 |
| LC121396_2015 | LC121398_2015 | JX477162_1997 | EF584334_1997 | EU139827_1999 | EU139837_1999 |
| KX232477_2016 | KX232479_2016 | AF386775_1998 | AJ518098_1998 | CY098476_2000 | CY098478_2000 |
|               |               | DQ415318_1999 | DQ249252_1999 | CY115919_2001 | CY115921_2001 |
|               |               | D13574_2000   | AJ518093_2000 | EU139829_2002 | GU135877_2002 |
|               |               | DQ397950_2001 | EU097709_2001 | CY040545_2003 | CY040546_2003 |
|               |               | DQ249260_2002 | AY297140_2002 | CY040543_2004 | EU409956_2004 |
|               |               | CY019341_2003 | CY019343_2003 | CY098509_2005 | FJ638300_2005 |
|               |               | EU097943_2004 | EU097720_2004 | CY157975_2006 | EU409961_2006 |
|               |               | EU097944_2005 | EU097718_2005 | EU604689_2007 | KR859539_2007 |
|               |               | EU097955_2006 | EU100639_2006 | HQ833574_2008 | HM461780_2008 |
|               |               | EU516142_2007 | EU516129_2007 | CY116338_2009 | CY158363_2009 |
|               |               | FJ264940_2008 | FJ403565_2008 | CY159966_2010 | CY159968_2010 |
|               |               | GQ290059_2009 | GQ475905_2009 | JQ809724_2011 | JN162018_2011 |
|               |               | KC781201_2010 | KC781200_2010 | JX092558_2012 | JX092590_2012 |
|               |               | CY121816_2011 | KC524475_2011 | KC759326_2013 | KC592045_2013 |
|               |               | KM437698_2012 | KM437700_2012 | KJ437583_2014 | KJ437561_2014 |
|               |               | KM409057_2013 | KT734960_2013 | KP759771_2015 | KR074128_2015 |
|               |               | KT836515_2014 | KM409206_2014 | KU565146_2016 | KU954069_2016 |
|               |               | KU589419_2015 | KU589421_2015 |               |               |
|               |               | KX006213_2016 | KX408581_2016 |               |               |

**Supplementary table 2.** H1N2 Influenza A virus sequence data (accession number\_year)

| Avian         |               | Human         |               | Swine         |               |
|---------------|---------------|---------------|---------------|---------------|---------------|
| HA            | NA            | HA            | NA            | HA            | NA            |
| CY178919_1976 | CY178921_1976 | FJ231786_2002 | AJ457943_2002 | AB434408_1980 | D00713_1980   |
| CY014901_1982 | CY014903_1982 | EU097959_2003 | EU103974_2003 | AF085414_1994 | AJ412697_1994 |
| CY136806_1994 | CY136808_1994 | JQ340003_2009 | JQ340004_2009 | CY116410_1997 | CY116412_1997 |
| AY038014_1999 | AY038015_1999 | KJ620415_2012 | KJ635918_2012 | HQ709201_1998 | AJ412704_1998 |
| AY233393_2001 | AY233391_2001 |               |               | AF250124_1999 | AY590829_1999 |
| CY060268_2002 | CY060270_2002 |               |               | AM920737_2000 | AY590826_2000 |
| FJ536843_2005 | FJ985238_2005 |               |               | AY060048_2001 | AY590828_2001 |
| KJ764772_2007 | KJ764773_2007 |               |               | CY116372_2002 | CY116374_2002 |
| AB546162_2008 | AB546164_2008 |               |               | AB294217_2003 | AB270752_2003 |
| JX566015_2009 | JX566199_2009 |               |               | DQ447187_2004 | DQ447184_2004 |
| CY133801_2010 | CY133803_2010 |               |               | EF556201_2005 | EF556202_2005 |
| KP658032_2011 | KP658017_2011 |               |               | HQ658487_2006 | DQ666943_2006 |
| KP658027_2012 | KP658012_2012 |               |               | EU98788_2007  | KR859426_2007 |
| LC121276_2015 | LC121278_2015 |               |               | AB514929_2008 | AB514932_2008 |
|               |               |               |               | HQ660237_2009 | HQ658488_2009 |
|               |               |               |               | KF305984_2010 | HE600192_2010 |
|               |               |               |               | KF305991_2011 | KR700044_2011 |
|               |               |               |               | KC295233_2012 | KR066624_2012 |
|               |               |               |               | AB921004_2013 | KC534989_2013 |
|               |               |               |               | KT827987_2014 | KT827864_2014 |
|               |               |               |               | KP710948_2015 | KP710950_2015 |
|               |               |               |               | KU565155_2016 | KU598279_2016 |

**Supplementary table 3.** H2N2 Influenza A virus sequence data (accession number\_year)

| Avian         |               | Human         |               |
|---------------|---------------|---------------|---------------|
| HA            | NA            | HA            | NA            |
| L11128_1978   | CY005540_1978 | L20406_1957   | J02156_1957   |
| L11139_1983   | CY067274_1983 | CY020317_1958 | AY209900_1958 |
| L11127_1984   | CY116957_1984 | L11134_1959   | AY209901_1959 |
| CY116907_1990 | CY116909_1990 | CY021933_1960 | CY125904_1960 |
| L11131_1991   | AB745485_1991 | CY125854_1961 | AY209904_1961 |
| CY042257_1994 | CY116973_1994 | KP098440_1962 | AY209906_1962 |
| CY042265_1995 | CY014823_1995 | CY035078_1963 | AY209910_1963 |
| AY684893_1999 | CY121961_1999 | L11126_1964   | AB101672_1964 |
| AB276115_2001 | AB276116_2001 | D13580_1965   | AY209914_1965 |
| CY036573_2004 | EU735812_2004 | KP412318_1966 | AY209918_1966 |
| AB669133_2006 | CY121969_2006 | CY020389_1967 | K01393_1967   |
| CY041234_2007 | CY121977_2007 | L11125_1968   | AB101673_1968 |
| CY141168_2008 | CY141170_2008 |               |               |
| CY133448_2010 | CY133450_2010 |               |               |
| CY205019_2011 | CY205021_2011 |               |               |
| CY191259_2012 | CY191013_2012 |               |               |
| KM100132_2013 | KM100134_2013 |               |               |

**Supplementary table 4.** H3N2 Influenza A virus sequence data (accession number\_year)

| Avian         |               | Human         |               | Swine         |               |
|---------------|---------------|---------------|---------------|---------------|---------------|
| HA            | NA            | HA            | NA            | HA            | NA            |
| AY531037_1969 | AJ574904_1969 | V01085_1968   | J02136_1968   | CY009300_1977 | CY009302_1977 |
| CY181037_1974 | CY181039_1974 | CY006299_1969 | AY210119_1969 | CY009308_1980 | CY009310_1980 |
| CY006026_1975 | CY005554_1975 | CY021085_1970 | AY210124_1970 | AJ252132_1982 | EF409252_1982 |
| CY178978_1976 | CY178980_1976 | J02132_1971   | AB101675_1971 | M73775_1984   | AJ293934_1984 |
| AB277754_1977 | AB277755_1977 | M54895_1972   | J02168_1972   | CY077919_1985 | CY077921_1985 |
| M73776_1978   | EU742654_1978 | CY009348_1973 | AB124660_1973 | EF409246_1987 | AJ293935_1987 |
| CY180259_1979 | CY180261_1979 | CY003496_1974 | CY003498_1974 | EF409247_1992 | AJ311455_1992 |
| CY178382_1980 | CY178384_1980 | V01086_1975   | CY003730_1975 | CY116095_1993 | EF409255_1993 |
| CY178663_1981 | CY178665_1981 | CY006723_1976 | AB124661_1976 | KR701354_1994 | D86470_1994   |
| CY177926_1983 | CY177928_1983 | X05907_1977   | AB124662_1977 | AM920723_1995 | AM920724_1995 |
| CY177990_1984 | CY177992_1984 | CY006707_1978 | CY006709_1978 | EF409248_1996 | AJ293936_1996 |

|               |               |               |               |               |               |
|---------------|---------------|---------------|---------------|---------------|---------------|
| CY020717_1986 | CY020719_1986 | DQ508825_1979 | K01150_1979   | EF409249_1997 | EF409257_1997 |
| CY017411_1988 | CY017413_1988 | CY007619_1980 | CY007621_1980 | KR701348_1998 | AJ293937_1998 |
| CY101856_1994 | CY101858_1994 | CY007627_1981 | CY007629_1981 | EF409250_1999 | AJ412703_1999 |
| GU186484_1998 | EU743197_1998 | CY077834_1982 | AB124664_1982 | DQ021911_2000 | KR701539_2000 |
| EU743501_1999 | EU743510_1999 | CY003720_1983 | CY003722_1983 | DQ021910_2001 | EF217407_2001 |
| GU051140_2000 | AJ697881_2000 | CY003744_1984 | CY116580_1984 | AM920742_2002 | AM920743_2002 |
| CY011048_2002 | EU429701_2002 | CY003504_1985 | U42632_1985   | AY852273_2003 | EU296610_2003 |
| AY779253_2003 | EU429720_2003 | CY002088_1986 | CY116588_1986 | AY852277_2004 | KR859359_2004 |
| EU301225_2004 | EU429745_2004 | CY003544_1987 | U42633_1987   | EU296613_2005 | EU296612_2005 |
| EU697204_2005 | EU429781_2005 | AJ252129_1988 | CY116579_1988 | KF007985_2006 | KR859364_2006 |
| FJ432762_2006 | EU429742_2006 | U97740_1989   | CY116582_1989 | EU982295_2007 | KR859384_2007 |
| CY043816_2007 | JN087106_2007 | CY003064_1990 | CY003066_1990 | AB762413_2008 | KR859528_2008 |
| FJ802401_2008 | FJ802403_2008 | CY113549_1991 | CY116583_1991 | KF007989_2009 | CY045561_2009 |
| AB545597_2009 | AB545598_2009 | U26830_1992   | CY003714_1992 | KF007981_2010 | CY122343_2010 |
| CY098262_2010 | CY098272_2010 | KM821285_1993 | CY006349_1993 | KF007984_2011 | KF007993_2011 |
| KU158891_2011 | KU158905_2011 | KM821286_1994 | AJ457946_1994 | KF007983_2012 | KR701267_2012 |
| LC028104_2012 | LC028106_2012 | AB019354_1995 | U51246_1995   | AB921006_2013 | KC534986_2013 |
| KM222572_2013 | AB916645_2013 | AF017270_1996 | AJ457942_1996 | KT827842_2014 | KT828103_2014 |
| KT022355_2014 | KT022357_2014 | AF363502_1997 | AJ291403_1997 | KP701520_2015 | KP701521_2015 |
| LC132912_2015 | LC132914_2015 | AB019355_1998 | AJ316063_1998 | KU565164_2016 | KU565165_2016 |
|               |               | AY035588_1999 | AF382329_1999 |               |               |
|               |               | EU103638_2000 | AJ307599_2000 |               |               |
|               |               | KM821312_2001 | AJ457960_2001 |               |               |
|               |               | EF568928_2002 | AY589662_2002 |               |               |
|               |               | AY531039_2003 | AY531006_2003 |               |               |
|               |               | DQ249261_2004 | DQ249255_2004 |               |               |
|               |               | EU103645_2005 | EU103854_2005 |               |               |
|               |               | EU021278_2006 | EU021279_2006 |               |               |
|               |               | EU021270_2007 | EU021271_2007 |               |               |
|               |               | EU851997_2008 | EU914858_2008 |               |               |
|               |               | GQ385931_2009 | GQ385930_2009 |               |               |
|               |               | KC535393_2010 | KC535392_2010 |               |               |
|               |               | KM821347_2011 | KJ942594_2011 |               |               |
|               |               | KJ942608_2012 | KJ942610_2012 |               |               |
|               |               | KT734919_2013 | KT734917_2013 |               |               |
|               |               | KJ623709_2014 | KJ623711_2014 |               |               |
|               |               | KU591071_2015 | KU591073_2015 |               |               |
|               |               | KX416480_2016 | KX416482_2016 |               |               |

**Supplementary table 5.** H5N1 Influenza A virus sequence data (accession number\_year)

| Avian         |               | Human         |               | Swine         |               |
|---------------|---------------|---------------|---------------|---------------|---------------|
| HA            | NA            | HA            | NA            | HA            | NA            |
| CY015081_1959 | AJ416625_1959 | AF028709_1997 | AF028708_1997 | DQ432037_2001 | DQ432038_2001 |
| CY179411_1982 | CY179413_1982 | GU052089_2001 | GU052091_2001 | DQ432045_2003 | DQ432046_2003 |
| EU871820_1983 | EU871822_1983 | EF541401_2003 | AB212056_2003 | DQ997253_2004 | DQ997254_2004 |
| S68489_1991   | GU052512_1991 | AY577314_2004 | AY679513_2004 | HM440075_2005 | HM440053_2005 |
| AF148678_1996 | AF144304_1996 | AB239125_2005 | DQ094290_2005 | HM440139_2006 | HM440085_2006 |
| AF046099_1997 | GU052122_1997 | EF200513_2006 | EU146890_2006 | KC683522_2008 | KC683526_2008 |
| AY585363_1999 | AY585408_1999 | EF535817_2007 | EU146921_2007 | KC683523_2009 | KC683527_2009 |
| AY075030_2000 | AY075031_2000 | KC784946_2008 | CY098690_2008 | KM027999_2011 | KM028001_2011 |
| AY075027_2001 | AY075028_2001 | CY098716_2009 | AB745469_2009 | KX364460_2014 | KX364459_2014 |
| DQ023145_2002 | DQ023147_2002 | CY062464_2010 | CY062465_2010 |               |               |
| DQ211922_2003 | AM183681_2003 | JN588805_2011 | JN588856_2011 |               |               |
| AY639405_2004 | AY649383_2004 | JQ714246_2012 | JQ714248_2012 |               |               |
| DQ407519_2005 | DQ659324_2005 | KF001372_2013 | KF001374_2013 |               |               |
| DQ676830_2006 | DQ676832_2006 | KM392416_2014 | KM392418_2014 |               |               |
| EF441277_2007 | EF486240_2007 |               |               |               |               |
| AB435522_2008 | AB435523_2008 |               |               |               |               |
| CY043374_2009 | AB517664_2009 |               |               |               |               |
| KR732445_2010 | HQ156767_2010 |               |               |               |               |
| KR732414_2011 | AB760281_2011 |               |               |               |               |
| AB786676_2012 | AB786678_2012 |               |               |               |               |
| KP035012_2013 | KP035021_2013 |               |               |               |               |
| KP674455_2014 | KR270334_2014 |               |               |               |               |
| KU143260_2015 | KU143342_2015 |               |               |               |               |
| KY029054_2016 | KX644143_2016 |               |               |               |               |

**Supplementary table 6.** H7N2 Influenza A virus sequence data (accession number\_year)

| Avian         |               |
|---------------|---------------|
| HA            | NA            |
| U20461_1978   | CY005620_1978 |
| AF072386_1994 | AY254117_1994 |
| AF072388_1995 | AY254120_1995 |
| AF072393_1996 | AY254125_1996 |
| AF072395_1997 | AY254128_1997 |
| AY240893_1998 | AY254114_1998 |
| AY240887_1999 | AY254119_1999 |
| AY240878_2000 | AY254106_2000 |
| AY240890_2001 | AY254108_2001 |
| AY240885_2002 | AY254110_2002 |
| FJ750874_2003 | CY021511_2003 |
| AY831668_2004 | AY831671_2004 |
| CY028507_2005 | CY028509_2005 |
| DQ873807_2006 | CY028574_2006 |
| CY033161_2007 | CY033163_2007 |
| KF573735_2008 | HM193634_2008 |
| KP636486_2009 | KP636488_2009 |
| KF259039_2013 | KF259567_2013 |
| KM054796_2014 | KM054798_2014 |

**Supplementary table 7.** H7N7 Influenza A virus sequence data (accession number\_year)

| Avian         |               |
|---------------|---------------|
| HA            | NA            |
| GU186777_1902 | GU186779_1902 |
| Z12617_1927   | CY014993_1927 |
| L37794_1934   | M38330_1934   |
| CY061602_1976 | CY024788_1976 |
| AF202247_1977 | KJ889441_1977 |
| U20459_1979   | CY015041_1979 |
| M17735_1985   | CY015021_1985 |
| U20465_1986   | CY178913_1986 |
| CY005980_1988 | CY005073_1988 |
| AB297923_1993 | AB297924_1993 |
| CY185821_1994 | CY185823_1994 |
| AB269695_1999 | AB450450_1999 |
| AY999978_2002 | KF695356_2002 |
| AY338458_2003 | AY340077_2003 |
| JN674638_2004 | JN674639_2004 |
| FJ803182_2005 | AM933237_2005 |
| AB558256_2006 | AM933236_2006 |
| AB558257_2007 | AM933238_2007 |
| AB558264_2008 | AB472060_2008 |
| AB558265_2009 | KF259624_2009 |
| KF258979_2010 | KF259627_2010 |
| AB813067_2011 | KF259636_2011 |
| AB813068_2012 | KF259620_2012 |
| KF259047_2013 | KF259673_2013 |
| KM593186_2014 | KM593188_2014 |
| KX979185_2015 | KX978353_2015 |

**Supplementary table 8.** H7N9 Influenza A virus sequence data (accession number\_year)

| Avian         |               |
|---------------|---------------|
| HA            | NA            |
| CY014786_1988 | CY014788_1988 |
| CY127253_1995 | CY127255_1995 |
| EU684261_2000 | CY186012_2000 |
| AY999981_2002 | KF695256_2002 |
| KX827377_2004 | KX827373_2004 |
| CY024818_2006 | CY024820_2006 |
| AB481212_2008 | AB481213_2008 |
| KF258951_2009 | KF259688_2009 |
| AB828686_2010 | KC609799_2010 |
| AB813056_2011 | CY133651_2011 |
| KF297293_2013 | KF259734_2013 |
| KU318989_2014 | KU318991_2014 |
| KU143284_2015 | KU143378_2015 |

**Supplementary table 9.** H7N10 Influenza A virus sequence data (accession number\_year)

| Avian         |               |
|---------------|---------------|
| HA            | NA            |
| M21647_1949   | AB292667_1949 |
| KF435049_1953 | KF435051_1953 |
| CY005993_1977 | CY005182_1977 |
| GU186624_1979 | GU186626_1979 |
| CY178254_1981 | CY178256_1981 |
| CY179235_1983 | CY179237_1983 |
| CY136379_1986 | CY136381_1986 |
| CY136349_1987 | CY136351_1987 |
| EU743314_1988 | EU743316_1988 |
| CY017781_1989 | CY017783_1989 |
| CY136737_1990 | CY136739_1990 |
| AB450431_1991 | AB450432_1991 |
| CY101840_1993 | CY101842_1993 |
| GU186493_1995 | GU186495_1995 |
| EU747329_1996 | EU747330_1996 |
| AB296078_1997 | AB296079_1997 |
| CY136965_1998 | CY136967_1998 |
| EU747327_1999 | EU747328_1999 |
| GU050906_2000 | EU743324_2000 |
| GU053303_2001 | EU743428_2001 |
| CY137466_2002 | CY137468_2002 |
| GU053338_2003 | GU053340_2003 |
| EU743394_2004 | EU743396_2004 |
| CY183702_2005 | CY183704_2005 |
| FJ183474_2006 | FJ183475_2006 |
| CY076864_2007 | AB450445_2007 |
| KX978964_2008 | KX978237_2008 |
| CY141391_2009 | CY136064_2009 |
| CY097694_2010 | CY097672_2010 |
| KX978624_2011 | KX979161_2011 |
| KF259194_2012 | KF259619_2012 |
| KR077964_2013 | KR077966_2013 |
| CY191291_2014 | CY191293_2014 |
| KX978577_2015 | KX978040_2015 |

**Supplementary table 10.** H9N2 Influenza A virus sequence data (accession number\_year)

| Avian         |               | Human         |               | Swine         |               |
|---------------|---------------|---------------|---------------|---------------|---------------|
| HA            | NA            | HA            | NA            | HA            | NA            |
| D90305_1966   | AJ574907_1966 | GU053179_1999 | GU053180_1999 | AY294658_2003 | DQ997429_2003 |
| KF188393_1976 | KF188394_1976 | KF188327_2000 | KF188328_2000 | AY790305_2004 | AY790299_2004 |
| AY206673_1978 | KF188322_1978 | KX867849_2004 | KX867851_2004 | EF612742_2005 | EF612744_2005 |
| AY206672_1979 | AF523404_1979 | KF188289_2008 | KF188290_2008 | CY075038_2007 | EU216107_2007 |
| KF188339_1980 | CY005875_1980 | KF188316_2009 | KF188318_2009 | KX867825_2008 | HM998916_2008 |
| KF188280_1981 | KF188344_1981 | KM455872_2013 | KM455874_2013 | KC779047_2009 | KC779051_2009 |
| KF188287_1983 | KF188288_1983 |               |               | KM029503_2010 | HQ893764_2010 |
| KF188341_1985 | KF188342_1985 |               |               | KX421150_2012 | KX421152_2012 |
| AY206675_1988 | KF188286_1988 |               |               |               |               |
| EU982308_1989 | EU982310_1989 |               |               |               |               |
| AY633164_1991 | CY014591_1991 |               |               |               |               |
| AF384557_1994 | DQ874395_1994 |               |               |               |               |
| AF203008_1996 | AF203786_1996 |               |               |               |               |
| AF461530_1997 | DQ064408_1997 |               |               |               |               |
| AF461510_1998 | EF626674_1998 |               |               |               |               |
| AY036880_1999 | DQ227353_1999 |               |               |               |               |
| AF461513_2000 | AY451388_2000 |               |               |               |               |
| AF461524_2001 | DQ681209_2001 |               |               |               |               |
| AY281745_2002 | AJ697879_2002 |               |               |               |               |
| DQ681203_2003 | DQ681213_2003 |               |               |               |               |
| DQ464352_2004 | DQ464353_2004 |               |               |               |               |
| EF063732_2005 | EF626683_2005 |               |               |               |               |
| EU157934_2006 | EF078977_2006 |               |               |               |               |
| EU216080_2007 | EU216093_2007 |               |               |               |               |
| AB485600_2008 | EU935062_2008 |               |               |               |               |
| JN381629_2009 | KP185601_2009 |               |               |               |               |
| JX273557_2010 | KF183629_2010 |               |               |               |               |
| JX273551_2011 | KF259527_2011 |               |               |               |               |
| KF259143_2012 | KF259545_2012 |               |               |               |               |
| KF259178_2013 | KF259581_2013 |               |               |               |               |
| KX598435_2014 | KX598494_2014 |               |               |               |               |
| KX598453_2015 | KU143352_2015 |               |               |               |               |

**Supplementary table 11.** Pearson correlation coefficients (r) of pairwise alignment score between HA and NA gene

| Subtype | Host  | r            | p-value         | n     |
|---------|-------|--------------|-----------------|-------|
| H1N1    | Human | <b>0.80*</b> | <i>p</i> <0.001 | 1,432 |
| H1N1    | Avian | 0.36*        | <i>p</i> <0.001 | 630   |
| H1N1    | Swine | 0.38*        | <i>p</i> <0.001 | 1,326 |
| H1N2    | Human | -0.22        | <i>p</i> >0.5   | 6     |
| H1N2    | Avian | 0.58*        | <i>p</i> <0.001 | 91    |
| H1N2    | Swine | 0.10         | <i>p</i> >0.1   | 231   |
| H2N2    | Human | 0.55*        | <i>p</i> <0.001 | 66    |
| H2N2    | Avian | 0.62*        | <i>p</i> <0.001 | 136   |
| H3N2    | Human | <b>0.94*</b> | <i>p</i> <0.001 | 1,176 |
| H3N2    | Avian | 0.35*        | <i>p</i> <0.001 | 465   |
| H3N2    | Swine | 0.30*        | <i>p</i> <0.001 | 465   |
| H5N1    | Human | 0.44*        | <i>p</i> <0.001 | 91    |
| H5N1    | Avian | 0.84*        | <i>p</i> <0.001 | 276   |
| H5N1    | Swine | 0.82*        | <i>p</i> <0.001 | 36    |
| H7N2    | Avian | 0.76*        | <i>p</i> <0.001 | 171   |
| H7N7    | Avian | 0.63*        | <i>p</i> <0.001 | 325   |
| H7N9    | Avian | 0.66*        | <i>p</i> <0.001 | 78    |
| H7N10   | Avian | 0.85*        | <i>p</i> <0.001 | 561   |
| H9N2    | Human | 0.02         | <i>p</i> >0.9   | 15    |
| H9N2    | Avian | 0.50*        | <i>p</i> <0.001 | 496   |
| H9N2    | Swine | 0.84*        | <i>p</i> <0.001 | 28    |

r: Pearson correlation coefficient, \* represents *p*<0.001, n: the number of dataset, Bold font was used for correlations of modest effect size (*r*>0.8, *n*>1,000)
